# Supplementary material for: The Complete Chloroplast Genome and Characteristics Analysis of Musa basjoo Siebold
Source: Research Square preprint supplement (doi:10.21203/rs.3.rs-531360/v1), 2021-06-02
Supplement: Supplementary file 1 [file 83dfa58fb6646a081eb9ba47.xlsx]

## Sheet: Sheet1
Species	Accesion	Genome size(bp)	LSC length(bp)	SSC length(bp)	IR length(bp)	Number of genes	Number of Protein-coding genes	Number of tRNA genes	Number of rRNA genes	LSC GC content(%)	SSC GC content(%)	IR GC content(%)	All GC content(%)	All AT content(%)
Musa basjoo Siebold	.	172322	90160	11668	35247	135	89	38	8	34.7	30.22	39.72	36.45	63.55
Musa acuminata subsp. malaccensis	HF677508.1	169972	88334	10768	35435	140	94	38	8	35.2	31.26	39.7	36.82	63.18
Musa beccarii	MK012089.1	168457	88164	11303	34495	131	85	38	8	35.16	31.03	39.9	36.83	63.17
Musa banksii	MK210631.1	170010	88369	10769	35436	132	87	37	8	35.18	31.21	39.69	36.81	63.19
Musa itinerans	MN087226.1	171815	89885	11646	35142	133	88	37	8	34.77	30.38	39.77	36.51	63.49
Musa textilis	NC_022926.1	161347	88016	18989	27171	132	86	38	8	35.08	31.13	42.38	37.07	62.93
Musa balbisiana	NC_028439.1	169503	87828	11487	35094	134	89	37	8	35.15	30.87	39.74	36.76	63.24
Musa itinerans	NC_035723.1	168985	87828	11335	34911	133	88	37	8	35.13	30.9	39.9	36.82	63.18
Musa balbisiana var. balbisiana	NC_039815.1	169458	87805	11485	35084	133	88	37	8	35.16	30.88	39.75	36.77	63.23
Musa ornata	NC_042874.1	169989	88362	10775	35426	133	88	37	8	35.19	31.23	39.7	36.82	63.18
