# Supplementary material for: The Complete Chloroplast Genome and Characteristics Analysis of Musa basjoo Siebold
Source: Research Square preprint supplement (doi:10.21203/rs.3.rs-531360/v1), 2021-06-02
Supplement: Supplementary file 2 [file d4d10482f0507498eaedacb1.xlsx]

## Sheet: Sheet1
SSR nr.	SSR type	Repeat Motif	Length(bp)	Start	End	Region	Gene
1	p1	(A)8	8	194	201	LSC
2	p1	(T)8	8	1900	1907	LSC	trnK-UUU
3	p3	(TTC)3	9	2100	2108	LSC	matK
4	p1	(T)9	9	3143	3151	LSC	matK
5	p1	(A)8	8	3227	3234	LSC	matK
6	p1	(A)14	14	3923	3936	LSC	trnK-UUU
7	p1	(T)8	8	4246	4253	LSC	trnK-UUU
8	p5	(AATAA)3	15	4420	4434	LSC
9	p3	(TAA)3	9	4508	4516	LSC
10	p3	(TAA)3	9	4528	4536	LSC
11	p1	(C)8	8	5421	5428	LSC	rps16
12	p3	(ATT)4	12	5561	5572	LSC	rps16
13	p1	(A)10	10	5584	5593	LSC	rps16
14	p1	(T)8	8	5864	5871	LSC	rps16
15	p1	(T)8	8	5940	5947	LSC	rps16
16	p4	(ATTG)3	12	6018	6029	LSC	rps16
17	p1	(T)9	9	7765	7773	LSC
18	p1	(C)12	12	8101	8112	LSC
19	p1	(A)10	10	8309	8318	LSC
20	p1	(A)8	8	9147	9154	LSC	psbI
21	p1	(A)8	8	9745	9752	LSC
22	p1	(T)9	9	9871	9879	LSC
23	p3	(AAT)3	9	14220	14228	LSC	atpF
24	p1	(T)11	11	14399	14409	LSC	atpF
25	p1	(A)9	9	15596	15604	LSC
26	p3	(GTA)3	9	16034	16042	LSC
27	c*	(TTA)3(ATTT)3(TTA)3*	28	16348	16375	LSC
28	c*	(ATA)3tttatta(TAT)4(TATTA)3*(TAT)4*agg(TATTA)3(TAT)4*	69	16424	16492	LSC
29	p1	(T)9	9	16691	16699	LSC
30	p1	(T)10	10	16795	16804	LSC
31	p3	(TAA)5	15	16925	16939	LSC
32	p1	(T)8	8	17904	17911	LSC
33	p1	(T)13	13	18733	18745	LSC
34	p1	(T)9	9	18854	18862	LSC
35	p1	(A)8	8	20373	20380	LSC	rpoC2
36	p1	(T)9	9	20847	20855	LSC	rpoC2
37	p1	(T)12	12	20951	20962	LSC	rpoC2
38	p1	(A)8	8	21095	21102	LSC	rpoC2
39	p2	(AT)5	10	22322	22331	LSC	rpoC2
40	p1	(T)8	8	23609	23616	LSC	rpoC1
41	p3	(TTC)3	9	24612	24620	LSC	rpoC1
42	p1	(A)8	8	24796	24803	LSC	rpoC1
43	p1	(T)8	8	28650	28657	LSC	rpoB
44	p3	(TAT)3	9	29610	29618	LSC
45	p3	(TAT)3	9	29634	29642	LSC
46	p3	(TAT)3	9	29677	29685	LSC
47	c	(AATA)3aagtag(AATA)3	30	30753	30782	LSC
48	p4	(AATA)3	12	30794	30805	LSC
49	p4	(AATA)3	12	30817	30828	LSC
50	p1	(A)8	8	31266	31273	LSC
51	p1	(T)8	8	32264	32271	LSC
52	p1	(T)9	9	32501	32509	LSC
53	p2	(TA)7	14	32590	32603	LSC
54	p1	(A)8	8	32685	32692	LSC
55	p5	(TTTAT)3	15	34423	34437	LSC
56	p1	(A)10	10	34573	34582	LSC
57	c	(T)8atc(A)14	25	35454	35478	LSC
58	p3	(TTA)3	9	35828	35836	LSC
59	c	(ATT)3agtata(AAT)3	24	35868	35891	LSC
60	p3	(TCT)3	9	36231	36239	LSC
61	c*	(T)8(TTTG)3*	17	36477	36493	LSC
62	p1	(G)8	8	38416	38423	LSC	psbC
63	p1	(A)9	9	39400	39408	LSC	trnS-UGA
64	p1	(A)8	8	40138	40145	LSC
65	p1	(C)10	10	40416	40425	LSC
66	p1	(T)11	11	40466	40476	LSC
67	p1	(T)11	11	40939	40949	LSC	rps14
68	p3	(TAT)3	9	41048	41056	LSC
69	p1	(A)8	8	41151	41158	LSC
70	p3	(ATG)3	9	42554	42562	LSC	psaB
71	p3	(GCA)3	9	44452	44460	LSC	psaA
72	p1	(T)8	8	45956	45963	LSC
73	p1	(A)12	12	48154	48165	LSC	ycf3
74	p1	(A)11	11	48659	48669	LSC
75	p3	(GTT)3	9	48808	48816	LSC
76	p1	(A)8	8	49983	49990	LSC
77	p1	(A)13	13	50993	51005	LSC
78	p1	(A)9	9	51081	51089	LSC
79	p4	(CAAA)3	12	51335	51346	LSC
80	p1	(T)8	8	52064	52071	LSC
81	p2	(TA)6	12	52532	52543	LSC
82	c	(A)9taagt(A)10	24	52701	52724	LSC
83	p3	(AAC)3	9	54301	54309	LSC	ndhK
84	p3	(AAT)4	12	55309	55320	LSC
85	p3	(AGA)3	9	55909	55917	LSC
86	p1	(T)8	8	59184	59191	LSC
87	p1	(T)14	14	59519	59532	LSC
88	c	(T)9c(T)8	18	59851	59868	LSC
89	p1	(T)8	8	61474	61481	LSC
90	p1	(A)11	11	61509	61519	LSC
91	p2	(TA)6	12	61585	61596	LSC
92	p3	(TTG)3	9	61639	61647	LSC
93	p1	(A)8	8	62515	62522	LSC	accD
94	p5	(ATTAT)3	15	64068	64082	LSC
95	p3	(ATA)4	12	64094	64105	LSC
96	p4	(ATAA)3	12	64334	64345	LSC
97	p5	(ATATA)3	15	64400	64414	LSC
98	p1	(T)8	8	65172	65179	LSC	ycf4
99	c*	(CTAA)3(CTAAT)3*	23	65681	65703	LSC
100	p1	(A)10	10	66040	66049	LSC
101	c	(A)8tg(A)8	18	66185	66202	LSC	cemA
102	p1	(T)9	9	68163	68171	LSC
103	p4	(GAAA)3	12	68272	68283	LSC
104	p3	(AAT)3	9	68375	68383	LSC
105	p4	(TCTT)3	12	69324	69335	LSC
106	p1	(A)9	9	70633	70641	LSC
107	p1	(T)9	9	72393	72401	LSC
108	c	(T)9gttctt(TTC)4	27	73241	73267	LSC
109	p3	(AAC)3	9	73973	73981	LSC	rps18
110	p1	(T)8	8	74231	74238	LSC
111	p1	(A)10	10	74947	74956	LSC
112	p2	(TA)7	14	75565	75578	LSC
113	p1	(A)10	10	76032	76041	LSC	clpP
114	p4	(AAGA)3	12	76138	76149	LSC	clpP
115	p1	(T)11	11	76311	76321	LSC	clpP
116	p1	(T)11	11	76575	76585	LSC	clpP
117	p1	(T)12	12	77004	77015	LSC	clpP
118	p4	(AAAT)3	12	77556	77567	LSC	clpP
119	p1	(T)8	8	78966	78973	LSC	psbB
120	p1	(A)8	8	81189	81196	LSC	petB
121	p1	(T)11	11	85591	85601	LSC
122	p1	(T)9	9	85623	85631	LSC
123	p3	(GAG)3	9	86015	86023	LSC
124	c*	(T)11(TTA)3*taaaattat(TTA)3	36	86504	86539	LSC
125	p3	(TTA)3	9	88177	88185	LSC	rpl16
126	p1	(T)11	11	88531	88541	LSC	rpl16
127	p3	(TGC)3	9	89658	89666	LSC	rpl22
128	p1	(T)10	10	89918	89927	LSC
129	c	(TTTTA)3cttt(TTTTA)3	34	89996	90029	LSC
130	p5	(TTTTA)3	15	90135	90149	LSC
131	p1	(A)8	8	90170	90177	IR
132	p1	(T)8	8	90198	90205	IR
133	p1	(T)9	9	90526	90534	IR	rps19
134	p1	(T)8	8	90567	90574	IR
135	p3	(CTT)3	9	90919	90927	IR	rpl2
136	p1	(A)8	8	95064	95071	IR	ycf2
137	p1	(A)9	9	96347	96355	IR	ycf2
138	p2	(GA)5	10	96368	96377	IR	ycf2
139	p1	(A)9	9	96716	96724	IR	ycf2
140	p3	(CTT)3	9	97226	97234	IR	ycf2
141	p3	(TGA)3	9	97759	97767	IR	ycf2
142	p3	(TGA)3	9	98320	98328	IR	ycf2
143	p3	(AGA)3	9	102427	102435	IR	ndhB
144	p3	(AGA)3	9	103886	103894	IR	ndhB
145	p1	(T)10	10	106060	106069	IR
146	p3	(AAG)3	9	107228	107236	IR
147	p3	(AAC)3	9	108038	108046	IR	rrn16
148	p3	(CTG)3	9	111946	111954	IR	rrn23
149	p3	(CAA)3	9	116884	116892	IR	ycf1
150	p1	(T)8	8	117634	117641	IR	ycf1
151	p1	(A)8	8	117798	117805	IR	ycf1
152	p3	(AGA)8	24	117847	117870	IR	ycf1
153	p3	(AGA)4	12	118084	118095	IR	ycf1
154	p3	(GAA)3	9	118265	118273	IR	ycf1
155	c	(AAC)3tg(A)8	19	118351	118369	IR	ycf1
156	p6	(AAGCAG)7	42	118593	118634	IR	ycf1
157	c	(A)9gacgaggag(A)12	30	118919	118948	IR	ycf1
158	p1	(A)9	9	119309	119317	IR	ycf1
159	p1	(A)10	10	119429	119438	IR	ycf1
160	p1	(A)9	9	119689	119697	IR	ycf1
161	p1	(A)9	9	119766	119774	IR	ycf1
162	p1	(A)8	8	120028	120035	IR	ycf1
163	c	(ACTAAG)3actcatc(A)8	33	120977	121009	IR	ycf1
164	p1	(A)8	8	121268	121275	IR	ycf1
165	p1	(A)8	8	121295	121302	IR	ycf1
166	p1	(A)8	8	121349	121356	IR	ycf1
167	p1	(A)8	8	121376	121383	IR	ycf1
168	p1	(A)8	8	121403	121410	IR	ycf1
169	c	(A)15caatccaag(A)8	32	121625	121656	IR	ycf1
170	p1	(A)8	8	122696	122703	IR
171	p3	(ATT)3	9	122720	122728	IR
172	p2	(AG)5	10	123578	123587	IR	ndhH
173	p3	(GCT)3	9	124845	124853	IR
174	p1	(T)8	8	125362	125369	IR
175	p4	(TTTA)3	12	125440	125451	SSC
176	p1	(A)8	8	125501	125508	SSC	ndhF
177	p1	(A)9	9	127711	127719	SSC
178	p1	(T)8	8	127957	127964	SSC
179	p1	(A)8	8	128217	128224	SSC
180	p1	(A)9	9	128672	128680	SSC	rpl32
181	p1	(T)8	8	129046	129053	SSC
182	p2	(TA)5	10	129125	129134	SSC
183	p1	(A)10	10	129272	129281	SSC
184	p3	(CAA)3	9	129386	129394	SSC
185	p3	(TTA)3	9	129454	129462	SSC
186	p3	(TAT)3	9	129632	129640	SSC
187	p2	(AT)5	10	130879	130888	SSC
188	p4	(AATA)3	12	131289	131300	SSC	ndhD
189	p1	(C)8	8	131491	131498	SSC	ndhD
190	p1	(T)8	8	131680	131687	SSC	ndhD
191	p3	(TAT)3	9	133241	133249	SSC
192	p3	(TAT)3	9	133310	133318	SSC
193	p3	(TAT)5	15	133385	133399	SSC
194	p4	(TTTA)3	12	134107	134118	SSC
195	p1	(A)11	11	134743	134753	SSC
196	p2	(TA)5	10	134891	134900	SSC
197	p3	(ATT)3	9	135218	135226	SSC
198	c	(ATT)3ta(ATT)3	20	135242	135261	SSC
199	p1	(T)8	8	136154	136161	SSC	ndhA
200	p1	(A)8	8	136691	136698	SSC	ndhA
201	c	(AATA)3tc(T)8	22	136870	136891	SSC	ndhA
202	p1	(A)10	10	136965	136974	SSC	ndhA
203	p1	(A)8	8	137114	137121	IR	ndhA
204	p3	(AGC)3	9	137630	137638	IR	ndhA
205	p2	(TC)5	10	138895	138904	IR	ndhH
206	p3	(AAT)3	9	139755	139763	IR
207	p1	(T)8	8	139780	139787	IR
208	c	(T)8cttggattg(T)15	32	140827	140858	IR	ycf1
209	p1	(T)8	8	141073	141080	IR	ycf1
210	p1	(T)8	8	141100	141107	IR	ycf1
211	p1	(T)8	8	141127	141134	IR	ycf1
212	p1	(T)8	8	141181	141188	IR	ycf1
213	p1	(T)8	8	141208	141215	IR	ycf1
214	c	(T)8gatg(AGTCTT)3	30	141474	141503	IR	ycf1
215	p1	(T)8	8	142448	142455	IR	ycf1
216	p1	(T)9	9	142709	142717	IR	ycf1
217	p1	(T)9	9	142786	142794	IR	ycf1
218	p1	(T)10	10	143045	143054	IR	ycf1
219	p1	(T)9	9	143166	143174	IR	ycf1
220	c	(T)12ctcctcgtc(T)9	30	143535	143564	IR	ycf1
221	p6	(CTTCTG)7	42	143846	143887	IR	ycf1
222	c	(T)8ca(GTT)3	19	144114	144132	IR	ycf1
223	p3	(TTC)3	9	144210	144218	IR	ycf1
224	p3	(TCT)4	12	144388	144399	IR	ycf1
225	p3	(TTC)8	24	144612	144635	IR	ycf1
226	p1	(T)8	8	144678	144685	IR	ycf1
227	p1	(A)8	8	144842	144849	IR	ycf1
228	p3	(TTG)3	9	145591	145599	IR	ycf1
229	p3	(CAG)3	9	150529	150537	IR	rrn23
230	p3	(GTT)3	9	154437	154445	IR	rrn16
231	p3	(CTT)3	9	155247	155255	IR
232	p1	(A)10	10	156414	156423	IR
233	p3	(TTC)3	9	158588	158596	IR	ndhB
234	p3	(TCT)3	9	160048	160056	IR	ndhB
235	p3	(TCA)3	9	164155	164163	IR	ycf2
236	p3	(TCA)3	9	164716	164724	IR	ycf2
237	p3	(AAG)3	9	165249	165257	IR	ycf2
238	p1	(T)9	9	165759	165767	IR	ycf2
239	p2	(TC)5	10	166106	166115	IR	ycf2
240	p1	(T)9	9	166128	166136	IR	ycf2
241	p1	(T)8	8	167412	167419	IR	ycf2
242	p3	(GAA)3	9	171555	171563	IR	rpl2
243	p1	(A)8	8	171909	171916	IR
244	p1	(A)9	9	171949	171957	IR	rps19
245	p1	(A)8	8	172278	172285	IR
246	p1	(T)8	8	172306	172313	IR
